# Supplementary material
Source: PubMed Central journal article supplement (PMC5380483)
Supplement: NIHMS846612-supplement-1.pdf [file NIHMS846612-supplement-1.pdf]

Fig. S1

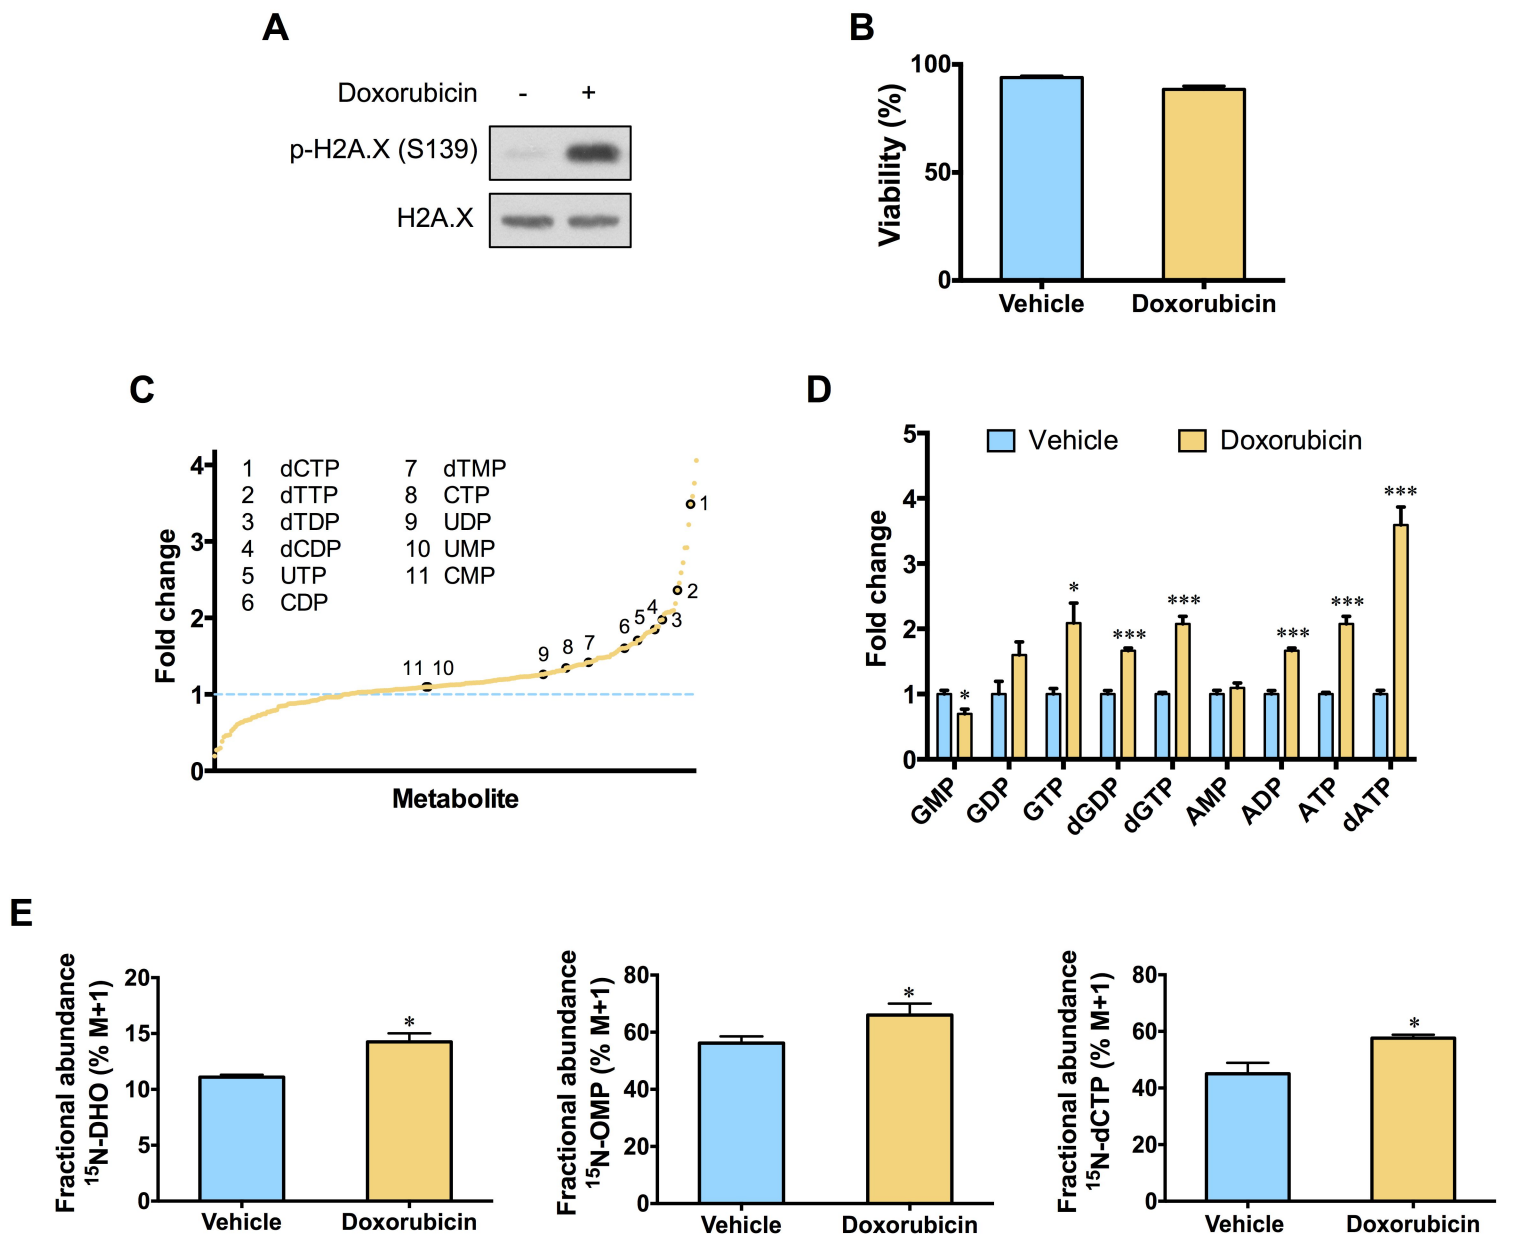

**Fig. S1. Chemotherapy exposure stimulates an increase in pyrimidine nucleotides in TNBC cells.** (A) SUM-159PT cells were treated with 0.5  $\mu$ M doxorubicin for 10 hours and histone H2A.X phosphorylation was monitored by immunoblotting. (B) SUM-159PT cells were exposed to 0.5  $\mu$ M doxorubicin for 48 hours and the percentage of dead cells in the population was determined using a propidium iodide viability assay. (C) Fold changes in the abundance of individual metabolites, highlighting pyrimidine nucleotides, as measured by LC-MS/MS in vehicle treated SUM-159PT cells versus SUM-159PT cells treated with 0.5  $\mu$ M doxorubicin for 10 hours. (D) Fold changes of purine nucleotide abundances as measured by LC-MS/MS in vehicle treated SUM-159PT cells versus SUM-159PT cells treated with 0.5  $\mu$ M doxorubicin for 10 hours. (E) Relative isotopic enrichment of L-glutamine (amide-<sup>15</sup>N) into dihydroorotate (DHO), orotidine-5-phosphate (OMP) and dCTP was measured by LC-MS/MS in vehicle treated SUM-159PT cells versus SUM-159PT cells treated with 0.5  $\mu$ M doxorubicin. All error bars represent SEM. \*  $P < 0.05$ , \*\*\*  $P < 0.001$  by a Student's *t*-test.
